# Supplementary material for: Targeting Class IA PI3K Isoforms Selectively Impairs Cell Growth, Survival, and Migration in Glioblastoma
Source: PubMed Central journal article supplement (PMC3981776; doi:10.1371/journal.pone.0094132), 2014-04-09
Supplement: pone.0094132.s005.pdf [file pone.0094132.s005.pdf]

**Supplementary Table S1.** Demographics and disease characteristics of 74 patients with complete disease and IHC information.

| <b>characteristics</b> |                                 | <b>number of patients (n = 74)</b> |
|------------------------|---------------------------------|------------------------------------|
| <b>gender</b>          | female                          | 26 (35.1%)                         |
|                        | male                            | 48 (64.9%)                         |
| <b>age (years)</b>     | median age at diagnosis (range) | 50.0 (1.0 - 80.0)                  |
| <b>WHO grade</b>       | I                               | 7 (9.4%)                           |
|                        | II                              | 8 (10.8%)                          |
|                        | III                             | 17 (23.0%)                         |
|                        | IV                              | 42 (56.8%)                         |
| <b>status</b>          | alive                           | 20 (27.0%)                         |
|                        | dead                            | 54 (73.0)                          |

WHO: world health organization
