# Supplementary material for: Targeting Class IA PI3K Isoforms Selectively Impairs Cell Growth, Survival, and Migration in Glioblastoma
Source: PubMed Central journal article supplement (PMC3981776; doi:10.1371/journal.pone.0094132), 2014-04-09
Supplement: pone.0094132.s007.pdf [file pone.0094132.s007.pdf]

**Supplementary Table S3.** Genetic background information about the GBM cell lines used in this study.

| <b>cell line</b> | <b><i>PTEN</i><sup>a,b</sup></b> | <b><i>TP53</i><sup>a</sup></b> | <b><i>PIK3CA</i><sup>c</sup></b> | <b><i>EGFR</i> amplification</b> | <b>MGMT expression<sup>d,e,f</sup></b> |
|------------------|----------------------------------|--------------------------------|----------------------------------|----------------------------------|----------------------------------------|
| <b>LN215</b>     | mut                              | mut                            | n.a.                             | n.a.                             | n.a.                                   |
| <b>LN229</b>     | wt                               | mut                            | wt                               | No                               | no                                     |
| <b>LN319</b>     | mut                              | mut                            | n.a.                             | n.a.                             | yes                                    |
| <b>U87</b>       | mut                              | wt                             | wt                               | no                               | no                                     |
| <b>U251</b>      | mut                              | mut                            | wt                               | no                               | no                                     |
| <b>T98G</b>      | mut                              | mut                            | wt                               | no                               | yes                                    |

mut: mutated, wt: wild type, n.a.: not available; (a) Ishii N, Maier D, Merlo A, Tada M, Sawamura Y, et al. (1999) Frequent co-alterations of TP53, p16/CDKN2A, p14ARF, PTEN tumor suppressor genes in human glioma cell lines. *Brain Pathol* 9: 469-479. (b) Furnari FB, Lin H, Huang HS, Cavenee WK (1997) Growth suppression of glioma cells by PTEN requires a functional phosphatase catalytic domain. *Proc Natl Acad Sci U S A* 94: 12479-84. (c) Kita D, Yonekawa Y, Weller M, Ohgaki H (2007) PIK3CA alterations in primary (de novo) and secondary glioblastomas. *Acta Neuropathol* 113: 295-302. (d) Yoshino A, Ogino A, Yachi K, Ohta T, Fukushima T, et al. (2010) Gene expression profiling predicts response to temozolomide in malignant gliomas. *Int J Oncol* 36: 1367-77. (e) van Niftrik KA, van den Berg J, van der Meide WF, Ameziane N, Wedekind LE, et al. (2010) Absence of the MGMT protein as well as methylation of the MGMT promoter predict the sensitivity for temozolomide. *Br J Cancer* 103: 29-35. (f) Hermisson M, Klumpp A, Wick W, Wischhusen J, Nagel G, et al. (2006) O6-methylguanine DNA methyltransferase and p53 status predict temozolomide sensitivity in human malignant glioma cells. *J Neurochem* 96: 766-76.
