# Supplementary material for: Targeting Class IA PI3K Isoforms Selectively Impairs Cell Growth, Survival, and Migration in Glioblastoma
Source: PubMed Central journal article supplement (PMC3981776; doi:10.1371/journal.pone.0094132), 2014-04-09
Supplement: pone.0094132.s008.pdf [file pone.0094132.s008.pdf]

**Supplementary Table S4.** Additional information about the GBM *ex vivo* cultures used in this study.

| <b><i>ex vivo</i> culture</b> | <b>WHO grade</b> | <b>age (years)</b> | <b>gender</b> |
|-------------------------------|------------------|--------------------|---------------|
| <b>EV1</b>                    | III              | 37                 | female        |
| <b>EV2</b>                    | IV               | 77                 | male          |
| <b>EV3</b>                    | II               | 42                 | female        |
| <b>EV4</b>                    | IV               | 59                 | male          |
| <b>EV5</b>                    | III              | 61                 | male          |
| <b>EV6</b>                    | IV               | 65                 | male          |
| <b>EV7</b>                    | IV               | 54                 | male          |

WHO: world health organization
